# Supplementary material
Source: publisher site journal article supplement (https://www.dovepress.com/article/456006)
Supplement: Supplementary file 1 [file get_supplementary_file.php]

## SUPPLEMENTARY MATERIAL

**Table S1.** Number of rimegepant tablets utilized per month among all treated participants.....Page 2

**Table S2.** Number of days per month using select analgesics or antiemetics.....Page 4

**Table S3.** List of institutional review boards and ethics committees approving the study protocol....Page 7

**Figure S1.** Proportion of participants with (A) 100% and (B) 50% reduction in the mean number of days per month using select analgesics following initiation of rimegepant treatment.....Page 8

**Figure S2.** Proportion of participants with (A) 100% and (B) 50% reduction in the mean number of days per month using select antiemetics following initiation of rimegepant treatment.....Page 9

**Table S1. Number of rimegepant tablets utilized per month among all treated participants.**

| Time interval | Rimegepant 75 mg dosing cohort |                            |                                | Overall   |
|---------------|--------------------------------|----------------------------|--------------------------------|-----------|
|               | PRN<br>(2–8) <sup>a</sup>      | PRN<br>(9–14) <sup>b</sup> | EOD+PRN<br>(4–14) <sup>c</sup> |           |
| Weeks 1–4     |                                |                            |                                |           |
| n             | 1033                           | 481                        | 286                            | 1800      |
| Mean (SD)     | 4.9 (3.3)                      | 8.5 (4.3)                  | 12.5 (3.4)                     | 7.1 (4.6) |
| Median        | 4.0                            | 8.0                        | 13.0                           | 6.0       |
| Weeks 5–8     |                                |                            |                                |           |
| N             | 998                            | 452                        | 269                            | 1719      |
| Mean (SD)     | 5.6 (3.8)                      | 9.2 (4.9)                  | 14.4 (4.0)                     | 7.9 (5.2) |
| Median        | 5.0                            | 8.0                        | 15.0                           | 7.0       |
| Weeks 9–12    |                                |                            |                                |           |
| n             | 959                            | 424                        | 251                            | 1634      |
| Mean (SD)     | 5.7 (4.1)                      | 8.7 (4.9)                  | 14.0 (3.3)                     | 7.7 (5.2) |
| Median        | 5.0                            | 8.0                        | 14.0                           | 7.0       |
| Weeks 13–16   |                                |                            |                                |           |
| N             | 925                            | 402                        | -                              | 1460      |
| Mean (SD)     | 5.5 (3.9)                      | 8.3 (5.2)                  | -                              | 6.0 (4.5) |
| Median        | 5.0                            | 8.0                        | -                              | 5.0       |
| Weeks 17–20   |                                |                            |                                |           |
| n             | 889                            | 382                        | -                              | 1274      |
| Mean (SD)     | 5.6 (3.8)                      | 8.3 (5.0)                  | -                              | 6.4 (4.4) |
| Median        | 5.0                            | 8.0                        | -                              | 6.0       |
| Weeks 21–24   |                                |                            |                                |           |
| n             | 861                            | 359                        | -                              | 1220      |
| Mean (SD)     | 5.7 (4.2)                      | 7.9 (4.8)                  | -                              | 6.3 (4.5) |
| Median        | 5.0                            | 7.0                        | -                              | 6.0       |
| Weeks 25–28   |                                |                            |                                |           |
| n             | 835                            | 343                        | -                              | 1178      |
| Mean (SD)     | 5.6 (4.0)                      | 8.1 (5.0)                  | -                              | 6.3 (4.5) |
| Median        | 5.0                            | 8.0                        | -                              | 6.0       |
| Weeks 29–32   |                                |                            |                                |           |
| n             | 802                            | 322                        | -                              | 1124      |
| Mean (SD)     | 5.6 (4.0)                      | 8.1 (4.9)                  | -                              | 6.3 (4.4) |
| Median        | 5.0                            | 7.0                        | -                              | 6.0       |
| Weeks 33–36   |                                |                            |                                |           |
| n             | 778                            | 312                        | -                              | 1090      |
| Mean (SD)     | 5.7 (4.2)                      | 8.3 (5.1)                  | -                              | 6.4 (4.6) |
| Median        | 5.0                            | 7.5                        | -                              | 6.0       |
| Weeks 37–40   |                                |                            |                                |           |
| n             | 755                            | 303                        | -                              | 1058      |
| Mean (SD)     | 5.7 (4.2)                      | 7.9 (5.1)                  | -                              | 6.3 (4.6) |
| Median        | 5.0                            | 7.0                        | -                              | 5.0       |
| Weeks 41–44   |                                |                            |                                |           |
| n             | 727                            | 293                        | -                              | 1020      |
| Mean (SD)     | 5.7 (4.4)                      | 8.2 (5.3)                  | -                              | 6.4 (4.8) |

|             |           |           |   |           |
|-------------|-----------|-----------|---|-----------|
| Median      | 5.0       | 7.0       | - | 5.0       |
| <hr/>       |           |           |   |           |
| Weeks 45–48 |           |           |   |           |
| n           | 711       | 286       | - | 997       |
| Mean (SD)   | 5.8 (4.1) | 8.0 (5.4) | - | 6.4 (4.6) |
| Median      | 5.0       | 7.0       | - | 6.0       |
| <hr/>       |           |           |   |           |
| Weeks 49–52 |           |           |   |           |
| n           | 693       | 279       | - | 972       |
| Mean (SD)   | 5.9 (4.6) | 8.1 (5.6) | - | 6.5 (5.0) |
| Median      | 5.0       | 7.0       | - | 5.0       |

<sup>a</sup>PRN dosing (up to 52 weeks) in participants with 2–8 moderate or severe attacks per month in the 3 months prior to screening.

<sup>b</sup>PRN dosing (up to 52 weeks) in participants with 9–14 moderate or severe attacks per month in the 3 months prior to screening.

<sup>c</sup>EOD+PRN dosing (up to 12 weeks) in participants with 4–14 moderate or severe attacks per month in the 3 months prior to screening.

**Abbreviations:** EOD, every other day; PRN, as needed; SD, standard deviation.

**Table S2. Number of days per month using select analgesics or antiemetics.<sup>a</sup>**

| Time interval               | Rimegepant 75 mg dosing cohort |                            |                                | Overall      |
|-----------------------------|--------------------------------|----------------------------|--------------------------------|--------------|
|                             | PRN<br>(2–8) <sup>b</sup>      | PRN<br>(9–14) <sup>c</sup> | EOD+PRN<br>(4–14) <sup>d</sup> |              |
| Observation period          |                                |                            |                                |              |
| n                           | 828                            | 388                        | 225                            | 1441         |
| No. days, mean (SD)         | 12.0 (11.1)                    | 14.0 (10.3)                | 11.6 (10.0)                    | 12.5 (10.7)  |
| No. days, median            | 6.0                            | 10.0                       | 7.0                            | 7.0          |
| Weeks 1–4                   |                                |                            |                                |              |
| n                           | 828                            | 388                        | 225                            | 1441         |
| No. days, mean (SD)         | 8.0 (11.8)                     | 9.2 (11.7)                 | 6.6 (10.6)                     | 8.1 (11.6)   |
| No. days, median            | 1.0                            | 3.0                        | 1.0                            | 2.0          |
| Mean (SD) change            | -3.9 (6.4)                     | -4.7 (6.6)                 | -5.0 (6.9)                     | -4.3 (6.6)   |
| [95% CI]                    | [-4.4, -3.5]                   | [-5.4, -4.1]               | [-6.0, -4.1]                   | [-4.7, -4.0] |
| <i>P</i> value <sup>e</sup> | <0.0001                        | <0.0001                    | <0.0001                        | <0.0001      |
| Median change               | -2.0                           | -3.0                       | -3.0                           | -2.6         |
| Weeks 5–8                   |                                |                            |                                |              |
| n                           | 806                            | 367                        | 216                            | 1389         |
| No. days, mean (SD)         | 7.6 (11.8)                     | 8.6 (12.0)                 | 6.1 (10.7)                     | 7.6 (11.7)   |
| No. days, median            | 0.0                            | 1.0                        | 0.0                            | 0.0          |
| Mean (SD) change            | -4.3 (6.8)                     | -5.4 (7.1)                 | -5.4 (6.9)                     | -4.7 (6.9)   |
| [95% CI]                    | [-4.7, -3.8]                   | [-6.1, -4.7]               | [-6.4, -4.5]                   | [-5.1, -4.4] |
| <i>P</i> value <sup>e</sup> | <0.0001                        | <0.0001                    | <0.0001                        | <0.0001      |
| Median change               | -2.7                           | -3.5                       | -4.0                           | -3.0         |
| Weeks 9–12                  |                                |                            |                                |              |
| n                           | 776                            | 346                        | 202                            | 1324         |
| No. days, mean (SD)         | 7.4 (11.8)                     | 8.6 (12.1)                 | 5.5 (10.5)                     | 7.4 (11.7)   |
| No. days, median            | 0.0                            | 1.0                        | 0.0                            | 0.0          |
| Mean (SD) change            | -4.3 (6.6)                     | -5.6 (7.2)                 | -5.8 (6.8)                     | -4.9 (6.8)   |
| [95% CI]                    | [-4.8, -3.9]                   | [-6.4, -4.8]               | [-6.7, -4.8]                   | [-5.3, -4.5] |
| <i>P</i> value <sup>e</sup> | <0.0001                        | <0.0001                    | <0.0001                        | <0.0001      |
| Median change               | -2.7                           | -3.9                       | -4.0                           | -3.0         |
| Weeks 13–16                 |                                |                            |                                |              |
| n                           | 751                            | 325                        | –                              | 1195         |
| No. days, mean (SD)         | 7.4 (11.8)                     | 8.2 (12.0)                 | –                              | 7.4 (11.8)   |
| No. days, median            | 0.0                            | 0.0                        | –                              | 0.0          |
| Mean (SD) change            | -4.3 (6.5)                     | -5.6 (6.9)                 | –                              | -4.9 (6.8)   |
| [95% CI]                    | [-4.8, -3.9]                   | [-6.4, -4.9]               | –                              | [-5.2, -4.5] |
| <i>P</i> value <sup>e</sup> | <0.0001                        | <0.0001                    | –                              | <0.0001      |
| Median change               | -2.7                           | -4.0                       | –                              | -3.0         |
| Weeks 17–20                 |                                |                            |                                |              |
| n                           | 724                            | 309                        | –                              | 1035         |
| No. days, mean (SD)         | 7.5 (11.9)                     | 8.3 (12.1)                 | –                              | 7.7 (12.0)   |
| No. days, median            | 0.0                            | 0.0                        | –                              | 0.0          |
| Mean (SD) change            | -4.2 (6.7)                     | -5.6 (7.0)                 | –                              | -4.6 (6.8)   |
| [95% CI]                    | [-4.7, -3.7]                   | [-6.3, -4.8]               | –                              | [-5.0, -4.2] |
| <i>P</i> value <sup>e</sup> | <0.0001                        | <0.0001                    | –                              | <0.0001      |

|                             |              |              |   |              |
|-----------------------------|--------------|--------------|---|--------------|
| Median change               | -2.7         | -4.0         | - | -3.0         |
| <hr/>                       |              |              |   |              |
| Weeks 21–24                 |              |              |   |              |
| n                           | 699          | 289          | - | 988          |
| No. days, mean (SD)         | 7.4 (11.9)   | 8.4 (12.2)   | - | 7.7 (12.0)   |
| No. days, median            | 0.0          | 0.0          | - | 0.0          |
| Mean (SD) change            | -4.3 (6.5)   | -5.6 (6.8)   | - | -4.7 (6.6)   |
| [95% CI]                    | [-4.8, -3.8] | [-6.4, -4.8] | - | [-5.1, -4.3] |
| <i>P</i> value <sup>e</sup> | <0.0001      | <0.0001      | - | <0.0001      |
| Median change               | -2.7         | -4.0         | - | -3.0         |
| <hr/>                       |              |              |   |              |
| Weeks 25–28                 |              |              |   |              |
| n                           | 679          | 277          | - | 956          |
| No. days, mean (SD)         | 7.2 (11.8)   | 8.2 (12.2)   | - | 7.5 (11.9)   |
| No. days, median            | 0.0          | 0.0          | - | 0.0          |
| Mean (SD) change            | -4.4 (6.6)   | -5.5 (6.6)   | - | -4.7 (6.6)   |
| [95% CI]                    | [-4.9, -3.9] | [-6.3, -4.7] | - | [-5.1, -4.3] |
| <i>P</i> value <sup>e</sup> | <0.0001      | <0.0001      | - | <0.0001      |
| Median change               | -2.9         | -4.1         | - | -3.0         |
| <hr/>                       |              |              |   |              |
| Weeks 29–32                 |              |              |   |              |
| n                           | 653          | 261          | - | 914          |
| No. days, mean (SD)         | 7.4 (11.9)   | 8.3 (12.3)   | - | 7.6 (12.0)   |
| No. days, median            | 0.0          | 0.0          | - | 0.0          |
| Mean (SD) change            | -4.3 (6.7)   | -5.4 (6.5)   | - | -4.6 (6.7)   |
| [95% CI]                    | [-4.8, -3.8] | [-6.2, -4.6] | - | [-5.0, -4.2] |
| <i>P</i> value <sup>e</sup> | <0.0001      | <0.0001      | - | <0.0001      |
| Median change               | -2.8         | -4.0         | - | -3.0         |
| <hr/>                       |              |              |   |              |
| Weeks 33–36                 |              |              |   |              |
| n                           | 631          | 253          | - | 884          |
| No. days, mean (SD)         | 7.5 (11.9)   | 8.1 (12.2)   | - | 7.6 (12.0)   |
| No. days, median            | 0.0          | 0.0          | - | 0.0          |
| Mean (SD) change            | -4.2 (6.9)   | -5.4 (6.4)   | - | -4.5 (6.8)   |
| [95% CI]                    | [-4.7, -3.6] | [-6.2, -4.7] | - | [-5.0, -4.1] |
| <i>P</i> value <sup>e</sup> | <0.0001      | <0.0001      | - | <0.0001      |
| Median change               | -2.8         | -4.0         | - | -2.9         |
| <hr/>                       |              |              |   |              |
| Weeks 37–40                 |              |              |   |              |
| n                           | 612          | 246          | - | 858          |
| No. days, mean (SD)         | 7.3 (11.9)   | 8.0 (12.1)   | - | 7.5 (12.0)   |
| No. days, median            | 0.0          | 0.0          | - | 0.0          |
| Mean (SD) change            | -4.4 (6.7)   | -5.5 (6.6)   | - | -4.7 (6.7)   |
| [95% CI]                    | [-5.0, -3.9] | [-6.3, -4.7] | - | [-5.2, -4.3] |
| <i>P</i> value <sup>e</sup> | <0.0001      | <0.0001      | - | <0.0001      |
| Median change               | -2.9         | -4.0         | - | -3.0         |
| <hr/>                       |              |              |   |              |
| Weeks 41–44                 |              |              |   |              |
| n                           | 589          | 235          | - | 824          |
| No. days, mean (SD)         | 7.3 (11.9)   | 7.8 (12.1)   | - | 7.5 (11.9)   |
| No. days, median            | 0.0          | 0.0          | - | 0.0          |
| Mean (SD) change            | -4.3 (6.6)   | -5.5 (6.4)   | - | -4.7 (6.6)   |
| [95% CI]                    | [-4.9, -3.8] | [-6.3, -4.7] | - | [-5.1, -4.2] |
| <i>P</i> value <sup>e</sup> | <0.0001      | <0.0001      | - | <0.0001      |

|                             |              |              |   |              |
|-----------------------------|--------------|--------------|---|--------------|
| Median change               | -2.8         | -4.0         | - | -3.0         |
| <b>Weeks 45–48</b>          |              |              |   |              |
| n                           | 577          | 228          | - | 805          |
| No. days, mean (SD)         | 7.2 (11.8)   | 8.0 (12.1)   | - | 7.4 (11.9)   |
| No. days, median            | 0.0          | 0.0          | - | 0.0          |
| Mean (SD) change            | -4.3 (6.4)   | -5.4 (6.6)   | - | -4.6 (6.4)   |
| [95% CI]                    | [-4.9, -3.8] | [-6.3, -4.6] | - | [-5.1, -4.2] |
| <i>P</i> value <sup>e</sup> | <0.0001      | <0.0001      | - | <0.0001      |
| Median change               | -2.9         | -4.0         | - | -3.0         |
| <b>Weeks 49–52</b>          |              |              |   |              |
| n                           | 560          | 225          | - | 785          |
| No. days, mean (SD)         | 7.2 (11.9)   | 8.0 (12.1)   | - | 7.5 (11.9)   |
| No. days, median            | 0.0          | 0.0          | - | 0.0          |
| Mean (SD) change            | -4.3 (6.5)   | -5.4 (6.5)   | - | -4.7 (6.5)   |
| [95% CI]                    | [-4.9, -3.8] | [-6.3, -4.6] | - | [-5.1, -4.2] |
| <i>P</i> value <sup>e</sup> | <0.0001      | <0.0001      | - | <0.0001      |
| Median change               | -2.9         | -4.2         | - | -3.0         |

<sup>a</sup>Among participants using analgesics or antiemetics during the observation period: PRN (2–8), n = 828; PRN (9–14), n = 388; EOD + PRN (4–14), n = 225; Overall, n = 1441. Number of drug days per 4 weeks is prorated to 28 days in the (1) observation period and (2) last time interval for participants with <28 study days in their last time interval.

<sup>b</sup>PRN dosing (up to 52 weeks) in participants with 2–8 moderate or severe attacks per month in the 3 months prior to screening.

<sup>c</sup>PRN dosing (up to 52 weeks) in participants with 9–14 moderate or severe attacks per month in the 3 months prior to screening.

<sup>d</sup>EOD+PRN dosing (up to 12 weeks) in participants with 4–14 moderate or severe attacks per month in the 3 months prior to screening.

<sup>e</sup>*P* value is relative to the observation period.

**Abbreviations:** CI, confidence interval; EOD, every other day; PRN, as needed; SD, standard deviation.

**Table S3. List of institutional review boards and ethics committees approving the study protocol.**

---

Schulman Associates IRB  
44445 Lake Forest Drive  
Suite 300  
Cincinnati, OH 45242  
United States of America

---

Advarra IRB  
6940 Columbia Gateway Drive  
Suite 110  
Columbia, MD 21046

---

Biomedical Research Alliance of New York, LLC.  
IRB  
1981 Marcus Avenue  
Suite 210  
Lake Success, NY 11042  
United States of America

---

Figure S1. Proportion of participants with (A) 100% and (B) 50% reduction in the mean number of days per month using select analgesics following initiation of rimegepant treatment.<sup>a</sup>

A. 100% reduction

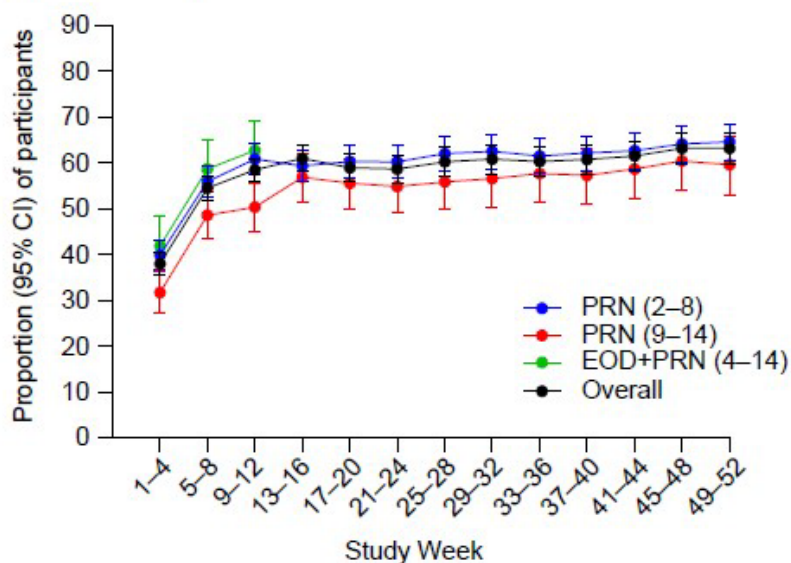

B. 50% reduction

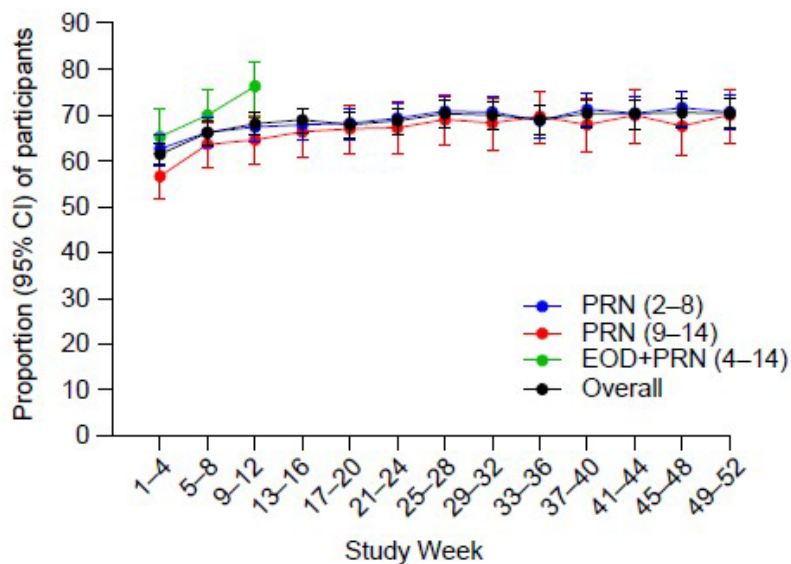

<sup>a</sup>Among participants using analgesics during the observation period: PRN (2-8), n = 814; PRN (9-14), n = 379; EOD + PRN (4-14), n = 222; Overall, n = 1415.

Confidence intervals were calculated using the Agresti-Coull method.

**Abbreviations:** CI, confidence interval; EOD, every other day; PRN, as needed.



Figure S2. Proportion of participants with (A) 100% and (B) 50% reduction in the mean number of days per month using select antiemetics following initiation of rimegepant treatment.<sup>a</sup>

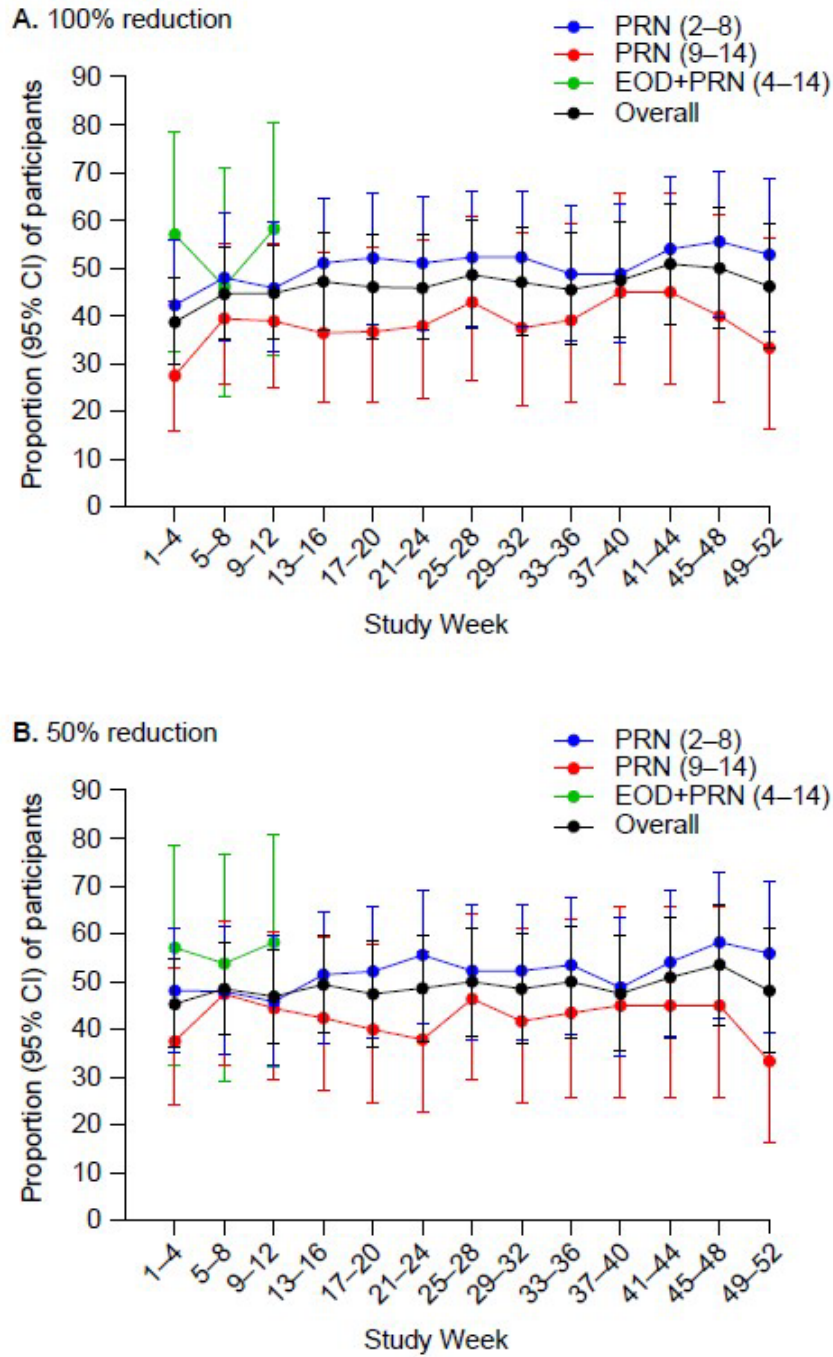

<sup>a</sup>Among participants using antiemetics during the observation period: PRN (2-8), n = 52; PRN (9-14), n = 40; EOD + PRN (4-14), n = 14; Overall, n = 106.

Confidence intervals were calculated using the Agresti-Coull method.

**Abbreviations:** CI, confidence interval; EOD, every other day; PRN, as needed.
